# Supplementary material
Source: PubMed Central journal article supplement (PMC6728672)
Supplement: DS_10.1177_0022034511409407.pdf [file DS_10.1177_0022034511409407.pdf]

## RESEARCH REPORTS

### Biological

T. Kinumatsu<sup>1,3</sup>, Y. Shibukawa<sup>2,3</sup>, T. Yasuda<sup>1</sup>,  
M. Nagayama<sup>2,4</sup>, S. Yamada<sup>3</sup>, R. Serra<sup>5</sup>,  
M. Pacifici<sup>1</sup>, and E. Koyama<sup>1\*</sup>

<sup>1</sup>Department of Surgery, The Children's Hospital of Philadelphia Research Institute, 3615 Civic Center Boulevard, Abramson Research Center, 902 Philadelphia, PA 19104, USA; <sup>2</sup>Department of Orthopaedic Surgery, Thomas Jefferson University College of Medicine, 1015 Walnut Street, Curtis Building Room 501, Philadelphia, PA 19107, USA; <sup>3</sup>Department of Periodontology, Tokyo Dental College, Chiba, 261-8502, Japan; <sup>4</sup>Department of Oral Pathology, Asahi University, Mizuho, Gifu, 501-0296, Japan; and <sup>5</sup>Department of Cell Biology, University of Alabama at Birmingham, Birmingham, AL 35294, USA; \*corresponding author, eiki.koyama@jefferson.edu

*J Dent Res* DOI: 10.1177/0022034511409407

## APPENDICES

### MATERIALS & METHODS

#### Ciliar Position in Superficial/Polymorphic Fibroblastic Cells

To analyze the position of the cilia in superficial/polymorphic layers, we immunostained para-sagittal and frontal sections from P0, P7, and P15 wild-type and *Kif3a*-deficient condyles with acetylated  $\alpha$ -tubulin monoclonal antibody, followed by Dapi-nuclear staining, and photographed the results. Random areas of superficial/polymorphic cell layers were examined (approximately 100 cells/field,  $n = 6$ ), and the fraction of cells displaying a clear and well-positioned cilium was determined.

#### Imaging

Consecutive sections from P15 control and *Kif3a*-deficient condyles were hybridized with isotope-labeled riboprobes encoding *type II collagen (Col II)* and *fibromodulin (Fm)*, and dark- and bright-field images were captured by means of a digital camera. Dark-field images of *Col-II* transcripts were pseudo-colored with Adobe Photoshop software and overlaid onto dark-field *Fm*-images to facilitate the appreciation of the length of a polymorphic cell layer.

## TMJ Development and Growth Require Primary Cilia Function

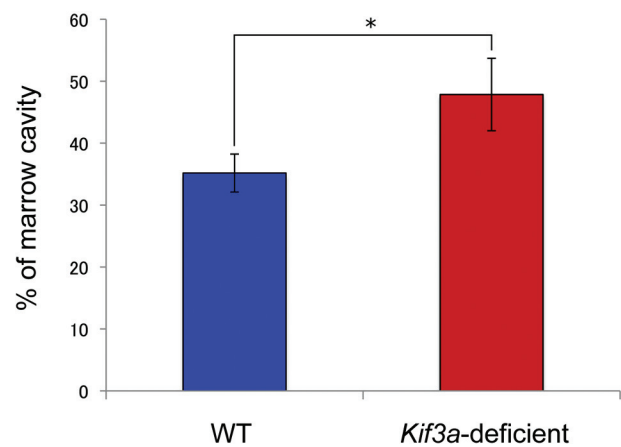

**Appendix Figure 1.** Defects in subchondral bone formation in *Kif3a*-deficient condyles. For quantification of loss of trabeculae in condylar subchondral bone, serial sections from 3-month-old wild-type and *Kif3a*-deficient mice were processed for histomorphometric analysis. Percentage of marrow cavity space *per* 0.5 × 0.5 mm<sup>2</sup> area was calculated from 8 randomly selected fields/sample. Statistical analysis was carried out by an unpaired Student's *t* test. *p*-values less than 0.02 were considered statistically significant (\**p* < 0.02). All statistical data are presented as means ± SD.

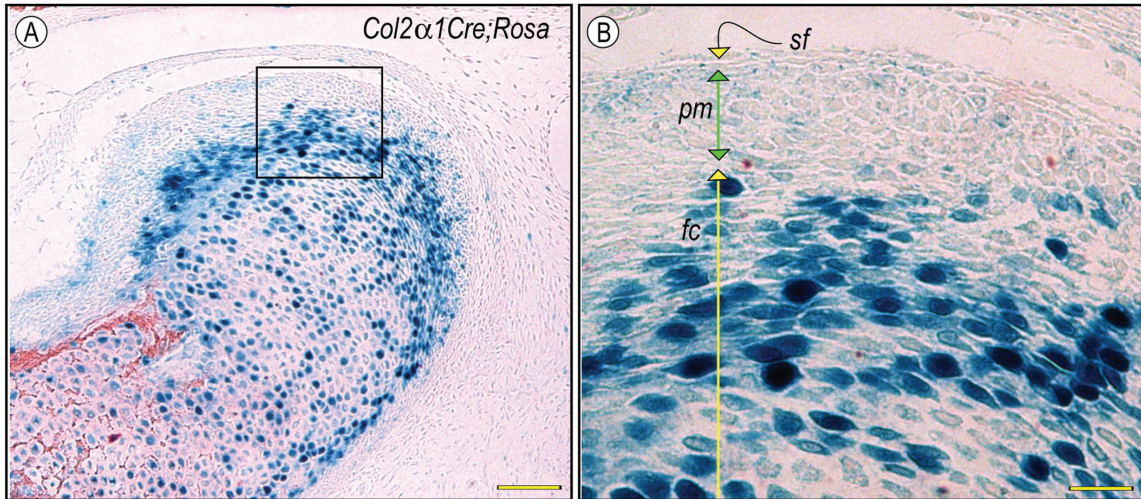

**Appendix Figure 2.** *Col2α1-Cre* activity in differentiating chondrocytes in mandibular condyles. Parasagittal sections from P0 *Col2α1-Cre;Rosa* mice were processed for  $\beta$ -galactosidase staining. Boxed areas in A are shown at higher magnification in B. Note specific *Col2α1-Cre* activity in differentiating chondrocytes and absence in superficial/polymorphic fibroblastic cells in developing mandibular condyles. *sf*, superficial layer; *pm*, polymorphic layer; *fc*, flattened chondrocyte layer. Scale bars: in A, 165  $\mu$ m; and in B, 55  $\mu$ m.

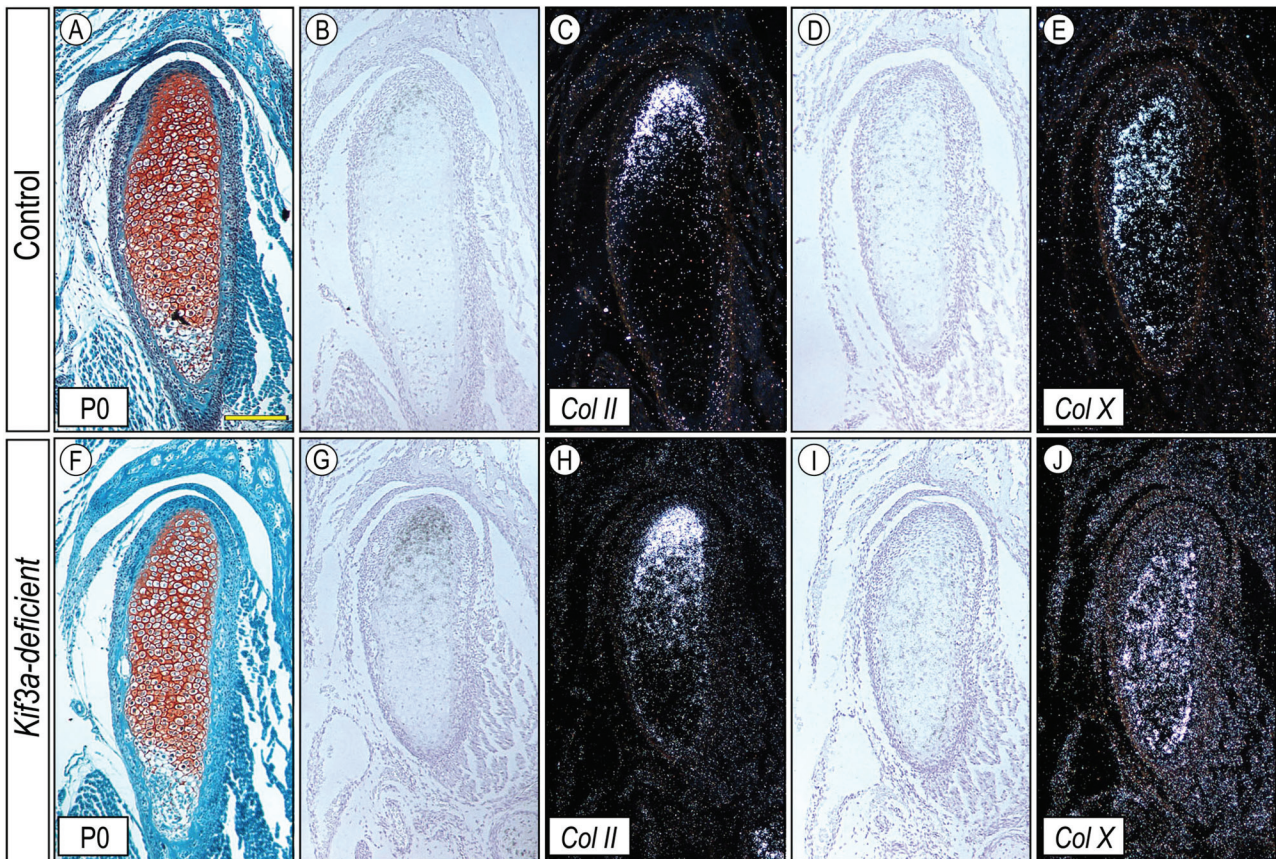

**Appendix Figure 3.** Chondrocyte maturation and zonal organization in newborn control and *Kif3a*-deficient mandibular condyles. Frontal sections from P0 control (A-E) and *Kif3a*-deficient (F-J) condyles were processed for safranin-O/fast green staining (A, F) and *in situ* hybridization with isotope-labeled riboprobes encoding Collagen type II (*Col II*) or Collagen type X (*Col X*). *Col II* and *Col X* expression characterizes flattened immature and hypertrophic chondrocytes in condylar cartilage (C, H and E, J, respectively), and *Col II*- and *Col X*-positive chondrocytes in *Kif3a*-deficient mice occupy a wider region of condylar cartilage. Scale bars: 150  $\mu$ m in A for A-J.



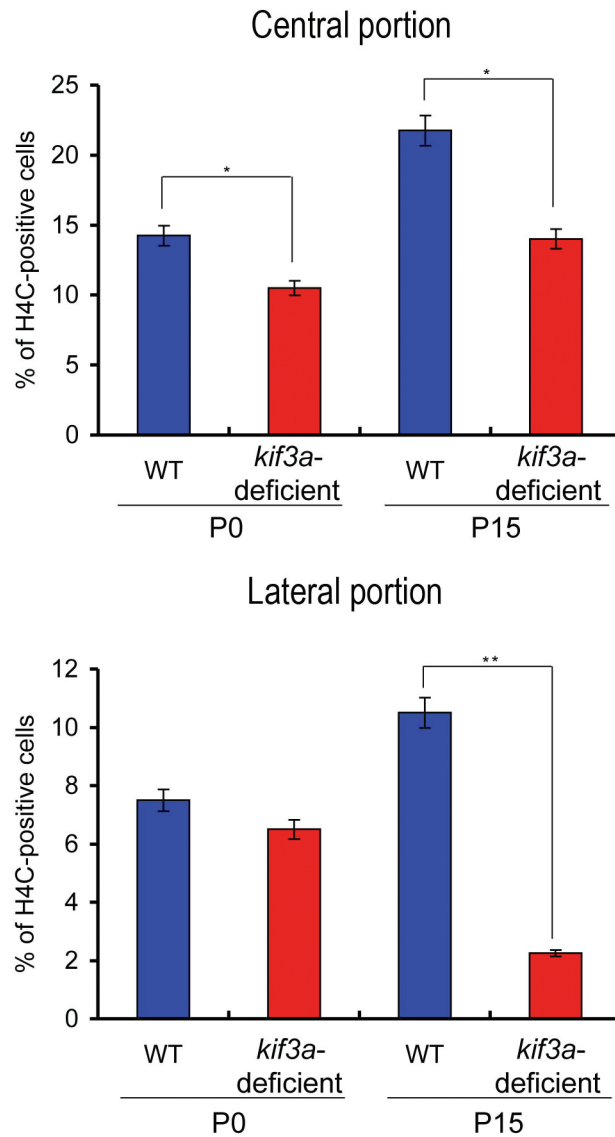

**Appendix Figure 4.** Decreases in mitotic activity of chondroprogenitor cells in *Kif3a*-deficient condyles. The number of *H4C*-positive proliferating chondroprogenitor cells present in the central and lateral portions of the condyles was counted in hybridized sections from control and *Kif3a*-deficient newborn and P15 condyles. For quantification of proliferating chondroprogenitor cells in the polymorphic layer, *H4C*-positive and -negative cells present in multiple sections from apex (central) and/or lateral portions of condyles were counted microscopically (approximately 100 cells/field,  $n = 6$ ) and used to calculate ratios of labeled cells/total cells. Statistical analysis was carried out by an unpaired Student's *t* test. *p*-values less than 0.05 were considered as statistically significant (\* $p < 0.05$ , \*\* $p < 0.001$ ). All statistical data are presented as means  $\pm$  SD. Note that the mitotic activity of chondroprogenitor cells is slightly reduced in the central portion of P15 *Kif3a*-deficient condyles (\* $p < 0.05$ , *Kif3a* mutant vs. control), but is significantly reduced in the lateral portion (\*\* $p < 0.01$ , *Kif3a* mutant vs. control).
